# Supplementary material for: Colorectal Adenomas Contain Multiple Somatic Mutations That Do Not Coincide with Synchronous Adenocarcinoma Specimens
Source: PLoS One. 2015 Mar 16;10(3):e0119946. doi: 10.1371/journal.pone.0119946 (PMC4361059; doi:10.1371/journal.pone.0119946)
Supplement: S1 Table — tROI: Bases that are able to be captured into the genome region that is targeted in the experiment. Specificity: The percentage of non-target bp sequenced among all bases sequenced. Enrichment: Efficiency of recovery for targeted bp in relation to the efficiency of recovery for non-targeted bp, C15: percentage of bases with at least 15X coverage. Mean_cov: mean coverage of the targeted region. Median_cov: median coverage of the targeted region. (XLS) [file pone.0119946.s003.xls]

## Sheet: Table S1.- Mapping and coverage
Supplementary table_S1: Mapping and coverage metrics
	PATIENT	SAMPLE	NAME	DNA SOURCE	MAPPED READS	t ROI	SPECIFICITY	ENRICHMENT	C15	MEAN_COV	MEDIAN_COV
	1	N1E073	normal mucosa-1	normal mucosa	96775014 (92,33%)	50570842	70.68	120.4	93.29	102.8	78
	1	N1E074	Adenoma-30	30 cms. adenomatous polyp	135088221 (92,34%)	50570842	69.46	113.61	95.88	140.97	108
	1	N1E075	Adenoma-90	90 cms. adenomatous polyp	113294027 (92,33%)	50570842	69.35	113.05	94.74	118.03	90
	1	N1E076	Adenocarcinoma-1	adenocarcinoma	98091065 (93,21%)	50570842	70.27	118.08	93.51	102.77	78
	2	N2E079	normal mucosa-2	normal mucosa	87415346 (93,12%)	50570842	69.43	113.47	92.08	90	69
	2	N2E069	hyperplastic polyp-2	hyperplastic polyp	113498431 (93,13%)	50570842	69.46	113.63	94.8	117.06	90
	2	N2E092	Adeno/Hyperp polyp-2	adenomatous polyp	75651571 (93,63%)	50570842	69.74	115.14	89.84	78.27	60
	2	N2E070	Adenoma-2	adenomatous polyp	113063750 (93,51)	50570842	68.66	109.46	94.66	115.34	88
	2	N2E072	Adenocarcinoma-2	adenocarcinoma	85714051 (93,39%)	50570842	68.68	109.54	91.47	87.49	67
	3	N3J876	normal mucosa-3	normal mucosa	87134067 (93.19%)	50728261	71.54	129.66	90.57	93.17	68
	3	N3J874	Adenoma-rectum	adenomatous polyp	89106102 (92,78%)	50728261	71.13	127.17	90.48	94.8	68
	3	N3J885	Adenoma-33	33 cms. adenomatous polyp	92753536 (92,27%)	50728261	69.58	118.02	90.92	96.47	69
	3	N3J872	Adenocarcinoma-3	adenocarcinoma	87363389 (92,17%)	50728261	71.98	132.53	93.02	94.07	64
	4	N4J881	normal mucosa-4	normal mucosa	5815084 (91,96%)	50728261	71.24	127.8	89.76	89.45	75
	4	N4J878	Adenoma-4B	adenomatous polyp	87404659(92,31%)	50728261	70.1	120.97	90.23	91.78	66
	4	N4J879	Adenoma-4C	adenomatous polyp	84477493 (92.68%)	50728261	70.1	120.95	90.02	88.51	65
	4	N4J877	Adenocarcinoma-4	adenocarcinoma	85258950 (92,91%)	50728261	70.19	121.46	89.76	89.45	64
