# Supplementary material for: Colorectal Adenomas Contain Multiple Somatic Mutations That Do Not Coincide with Synchronous Adenocarcinoma Specimens
Source: PLoS One. 2015 Mar 16;10(3):e0119946. doi: 10.1371/journal.pone.0119946 (PMC4361059; doi:10.1371/journal.pone.0119946)
Supplement: S2 Table — Wt Allele: Wild type nucleotide. Mut Allele: Mutated nucleotide. Ref. Reads: Number of reads of the Wt Allele. Mut reads: Number of reads of the Wt Allele. TumorA, C, G or T: Number of reads of each nucleotide. (XLS) [file pone.0119946.s004.xls]

## Sheet: Table S2.- Validation
Supplementary table S2: Validation panel.
sample	Name	Gene	Cromosoma	Position	WtAllele	MutAllele	Ref_reads	Mut_reads	TumorA	TumorC	TumorG	TumorT	Result
N2E072	Adenocarcinoma-2	AKT2	Chr19	40762843	G	C	1839	437	0	437	1839	0	SUBSTITUTION
N2E072	Adenocarcinoma-2	ADCY1	Chr7	45744165	G	A	840	178	178	0	840	0	SUBSTITUTION
N2E072	Adenocarcinoma-2	ARFGEF1	Chr8	68208781	A	G	91	21	91	0	21	0	SUBSTITUTION
N2E072	Adenocarcinoma-2	BAI2	Chr1	32201250	C	G	287	101	0	287	101	0	SUBSTITUTION
N2E072	Adenocarcinoma-2	DUSP15	Chr20	30450487	C	T	285	122	0	285	0	122	SUBSTITUTION
N2E072	Adenocarcinoma-2	ERBB4	Chr2	212530168	T	A	509	108	108	0	0	509	SUBSTITUTION
N2E072	Adenocarcinoma-2	CDKN3	Chr14	54878241	T	C	685	64	0	64	0	685	SUBSTITUTION
N2E072	Adenocarcinoma-2	FAT4	Chr4	126412567	A	T	1463	153	1463	0	0	153	SUBSTITUTION
N2E072	Adenocarcinoma-2	IL31	Chr12	122657162	G	C	320	37	0	37	320	0	SUBSTITUTION
N2E072	Adenocarcinoma-2	KRAS	Chr12	25398285	C	T	349	101	0	349	0	101	SUBSTITUTION
N2E072	Adenocarcinoma-2	LRP5	Chr11	68157518	G	A	2878	424	424	0	2878	0	SUBSTITUTION
N2E072	Adenocarcinoma-2	PLCZ1	Chr12	18837081	A	C	1185	171	1185	171	0	0	SUBSTITUTION
N2E072	Adenocarcinoma-2	SMAD2	Chr18	45368209	T	C	32	7	0	7	0	32	SUBSTITUTION
N2E072	Adenocarcinoma-2	SMOC2	Chr6	168949856	C	T	173	10	0	173	0	10	SUBSTITUTION
N2E072	Adenocarcinoma-2	SNX13	Chr7	17885311	T	C	18	6	0	6	0	18	SUBSTITUTION
N2E072	Adenocarcinoma-2	APC-1	Chr5	112174793	G	T	265	31	0	0	265	31	SUBSTITUTION
N2E072	Adenocarcinoma-2	APC-2	Chr5	112175507	C	T	1145	140	0	1145	0	140	SUBSTITUTION
N2E072	Adenocarcinoma-2	ARHGAP19	Chr10	99003739	G	A	86	9	9	0	86	0	SUBSTITUTION
N2E072	Adenocarcinoma-2	SMAD3	Chr15	67479795	C	T	1262	559	0	1262	0	559	SUBSTITUTION
N2E070	Adenoma-2	ACY3	Chr11	67413212	G	A	246	113	113	0	246	0	SUBSTITUTION
N2E070	Adenoma-2	APEX2	ChrX	55032975	C	T	945	181	0	945	0	181	SUBSTITUTION
N2E070	Adenoma-2	DBF4B	Chr17	42827993	G	A	821	102	102	0	821	0	SUBSTITUTION
N2E070	Adenoma-2	DSCAM	Chr21	41711243	G	A	3114	200	200	0	3114	0	SUBSTITUTION
N2E070	Adenoma-2	EGLN1	Chr1	231502192	T	C	26	10	0	10	0	26	SUBSTITUTION
N2E070	Adenoma-2	HK3	Chr5	176314473	G	A	7534	1419	1419	0	7534	0	SUBSTITUTION
N2E070	Adenoma-2	APC-3	Chr5	112175213	A	T	387	878	387	0	0	878	SUBSTITUTION
N2E070	Adenoma-2	LRRC4C	Chr11	40136965	A	G	944	492	944	0	492	0	SUBSTITUTION
N2E070	Adenoma-2	PIK3CG	Chr7	106526642	A	T	61	41	61	0	0	41	SUBSTITUTION
N2E070	Adenoma-2	PTK6	Chr20	62163954	C	T	740	420	0	740	0	420	SUBSTITUTION
N2E070	Adenoma-2	PTPRF-1	Chr1	44035444	G	A	117	53	53	0	117	0	SUBSTITUTION
N2E070	Adenoma-2	RAMP1	Chr2	238785871	C	A	1095	139	139	1095	0	0	SUBSTITUTION
N2E070	Adenoma-2	SNX13-2	Chr7	17841230	G	C	24	8	0	8	24	0	SUBSTITUTION
N2E070	Adenoma-2	TNFRSF8	Chr1	12186098	G	A	409	37	37	0	409	0	SUBSTITUTION
N2E092	Adenoma/Hyper-2	F2	Chr11	46749688	C	A	371	208	208	371	0	0	SUBSTITUTION
N2E092	Adenoma/Hyper-2	RASGRP2	Chr11	64507568	A	G	304	45	304	0	45	0	SUBSTITUTION
N2E092	Adenoma/Hyper-2	ZNRF3	Chr22	29383086	A	G	15	7	15	0	7	0	SUBSTITUTION
N2E092	Adenoma/Hyper-2	ARHGAP12	Chr10	32197285	T	A	81	31	31	0	0	81	SUBSTITUTION
N1E076	Adenocarcinoma-1	ADCY2	Chr5	7804710	C	T	593	301	0	593	0	301	SUBSTITUTION
N1E076	Adenocarcinoma-1	GHR	Chr5	42695074	G	T	184	94	0	0	184	94	SUBSTITUTION
N1E076	Adenocarcinoma-1	INSR	Chr19	7119568	A	G	1311	314	1311	0	314	0	SUBSTITUTION
N1E076	Adenocarcinoma-1	KAT6B	Chr10	76780405	C	T	173	60	0	173	0	60	SUBSTITUTION
N1E076	Adenocarcinoma-1	MAML1	Chr5	179192432	C	T	19	9	0	19	0	9	SUBSTITUTION
N1E076	Adenocarcinoma-1	NBR1	Chr17	41352594	G	A	208	51	51	0	208	0	SUBSTITUTION
N1E076	Adenocarcinoma-1	PRDM14	Chr8	70964415	C	T	358	150	0	358	0	150	SUBSTITUTION
N1E076	Adenocarcinoma-1	RAPGEF3	Chr12	48151855	A	G	734	229	734	0	229	0	SUBSTITUTION
N1E074	Adenoma-30	APC-3	Chr5	112175174	G	T	292	47	0	0	292	47	SUBSTITUTION
N1E074	Adenoma-30	BMP10	Chr2	69093453	G	T	504	28	0	0	504	28	SUBSTITUTION
N1E074	Adenoma-30	GRM6	Chr5	178419033	G	A	1066	178	178	0	1066	0	SUBSTITUTION
N1E074	Adenoma-30	PTGER3	Chr1	71418640	C	T	394	79	0	394	0	79	SUBSTITUTION
N1E074	Adenoma-30	RARA	Chr17	38512455	A	G	514	55	514	0	55	0	SUBSTITUTION
N1E074	Adenoma-30	GPR112	ChrX	135438301	G	T	112	31	0	0	112	31	SUBSTITUTION
N1E074	Adenoma-30	LRP1B	Chr2	141115596	G	A	103	24	24	0	103	0	SUBSTITUTION
N1E074	Adenoma-30	APC-6	Chr5	112164616	C	T	206	29	0	206	0	29	SUBSTITUTION
N1E075	Adenoma-90	BRD4	Chr19	15383837	T	C	16	8	0	8	0	16	SUBSTITUTION
N1E075	Adenoma-90	NFATC2IP	Chr16	28970176	A	G	319	272	319	0	272	0	SUBSTITUTION
N1E075	Adenoma-90	NYAP2	Chr2	226447383	C	T	117	69	0	117	0	69	SUBSTITUTION
N1E075	Adenoma-90	PLXNB2	Chr22	50724430	G	A	1591	744	744	0	1591	0	SUBSTITUTION
N1E075	Adenoma-90	TIAL1	Chr10	121336630	C	A	21	19	19	21	0	0	SUBSTITUTION
N1E075	Adenoma-90	TYRO3	Chr15	41865517	A	G	1854	1156	1854	0	1156	0	SUBSTITUTION
