# Supplementary material for: Colorectal Adenomas Contain Multiple Somatic Mutations That Do Not Coincide with Synchronous Adenocarcinoma Specimens
Source: PLoS One. 2015 Mar 16;10(3):e0119946. doi: 10.1371/journal.pone.0119946 (PMC4361059; doi:10.1371/journal.pone.0119946)
Supplement: S3 Table — (XLS) [file pone.0119946.s005.xls]

## Sheet: Table S3.- Oligos for validatio
Supplementary table_S3: Oligonucleotides used for validation analysis
Primer_ID	Left_primer	Right_primer	Left_Tm	Right_Tm	Included_region_start	Included_region_end	Fragment_size
E072_Chr6_157527848_ARID1B	ATAGTGGCCTTCTGCACTGG	GCTTGATGTTCCGGTGACTT	60.277	60.119	157527733	157528027	315
E072_Chr19_40762843_AKT2	GAAAACAGATCCAAGGGCAA	GTGAGTCACCGTCACACTGG	60.051	60.207	40762724	40763055	352
E072_Chr7_45744165_ADCY1	GTTGGGGACAGGAATGTGTC	CAGTTTAGGGCAGAGCTTGG	60.223	60.008	45743932	45744273	362
E072_Chr2_96780987_ADRA2B	CACTGCCCACCTATAGCACC	AACGGACACTCGAAGTCCAC	60.538	60.159	96780851	96781150	320
E072_Chr8_68208781_ARFGEF1	TTTCCATGCGTGCAAAGAT	CTGCTGCGAGAGGATCACTT	60.213	60.7	68208693	68209004	331
E072_Chr1_32201250_BAI2	AGAGAGCTGGGTTAGGGTGG	AGGGTCATCCTGTTTCTCCC	60.64	60.314	32201010	32201386	397
E072_Chr20_30450487_DUSP15	CTTGACCCCATCCCTACCTT	TATGGTTGGAGCTCAGGAGG	60.183	60.21	30450377	30450658	302
E072_Chr2_212530168_ERBB4	TTACCCTTGGGTGCAGTTTG	ATCCACATTTGCACTGCTGA	60.913	60.272	212530064	212530353	310
E072_Chr14_54878241_CDKN3	TGTGTATCCTGGTCTATTGGCA	ACATTGTGCCAGTGCTTTCC	60.386	61.107	54878201	54878574	396
E072_Chr4_126412567_FAT4	ACTGCAGAAGGCCACTGTCT	CCTAGCTTCATGGGCAGTGT	60.057	60.277	126412450	126412742	313
E072_Chr12_2968418_FOXM1	GGAGGTTTGTACTGGGCTGA	GGTGTGTCTCGGAAATGCTT	60.111	60.119	2968187	2968522	356
E072_Chr12_122657162_IL31	CTTAAGTGGTGGCCTGTTGG	TTCCACAGGTGGAGGAAGAG	60.541	60.229	122656978	122657296	339
E072_Chr12_25398285_KRAS	TGGACCCTGACATACTCCCA	GGCCTGCTGAAAATGACTGA	61.342	61.329	25398026	25398330	325
E072_Chr11_68157518_LRP5	GATGCTGCAGAGACCAGACA	CAAATAGCAGAGCACAGGCA	60.146	60.157	68157313	68157629	337
E072_Chr12_18837081_PLCZ1	CTTCCTGTCAGTCCCACACC	CATGTCCCAGAATTGGCATT	60.563	60.723	18836878	18837172	315
E072_Chr11_8161609_RIC3	AGTTGTGAATTTTGGGGCAA	TCGTTTCCAGAGGTCTCACC	60.344	60.238	8161310	8161670	381
E072_Chr18_45368209_SMAD2	AGTCCATAGGGACCACACACA	GCGGAATAATCGTGTCCAAA	60.291	60.837	45368139	45368459	342
E072_Chr6_168949856_SMOC2	AAGGAACATTGTGCTTTCGTG	GGCTGCCAGTCTACAAGAGG	60.161	60.012	168949770	168950080	332
E072_Chr7_17885311_SNX13	TCCCAAAGTTTGCTGCAAGT	CTTCACCCTTTTAGCCTTTGG	60.807	60.109	17885301	17885648	368
E072_Chr3_55508598_WNT5A	GCGGTAGCCATAGTCGATGT	TCCATCTCTACCTTGCCCC	60.125	60.019	55508496	55508787	312
E072_Chr19_40762869_AKT2	GAAAACAGATCCAAGGGCAA	GTGAGTCACCGTCACACTGG	60.051	60.207	40762724	40763055	352
E072_Chr5_112174793_APC	TTCTCCATACAGGTCACGGG	GAGCTGATTCTGCCTCTTGG	60.913	60.096	112174608	112174984	397
E072_Chr5_112175507_APC	CCCTAGAACCAAATCCAGCA	TGTCCAGGGCTATCTGGAAG	60.066	60.21	112175298	112175577	300
E072_Chr10_99003739_ARHGAP19	TCAGCAAACTTGGGACATGA	GTAGATTCCTGCCCTCACCA	60.24	60.073	99003487	99003844	378
E072_Chr15_67479795_SMAD3	AGTGTGGAGTGTGTGGCAAA	CTCATCTCTGAGGAGCCCTG	60.203	60.088	67479567	67479932	386
E072_chr2_43655276_THADA	AGAAGAATGGCGTGAACCTG	AGACTCTACGCTTCCCCGAT	60.255	60.233	43655021	43655312	312
E072_chr3_65425560_MAGI1	CTCAGATTTCACCCCATGCT	AGCATCTCAGACCACCTGCT	60.073	60.017	65425516	65425800	305
E070_Chr18_77171473_NFATC1	ACCACCCAGTACACCAGCTC	GGCTCACCTCATGTAGGACG	60.033	60.678	77171205	77171508	324
E070_Chr11_67413212_ACY3	AGGTGCATGGCAAAGACTTC	TTTTACCGGGAAGTGCAGAG	60.263	60.241	67413199	67413545	367
E070_Chr2_96780987_ADRA2B	CACTGCCCACCTATAGCACC	AACGGACACTCGAAGTCCAC	60.538	60.159	96780851	96781150	320
E070_ChrX_55032975_APEX2	TGCAAGACAAATGCAAGCTC	ACTGGCACCCCAAGTTACTG	60.142	60.028	55032733	55033017	305
E070_Chr17_42827993_DBF4B	CTTTCAAAGGAAGAAGGGGG	CATGTGTGACTTGCAGGAGG	60.04	60.309	42827759	42828044	306
E070_Chr21_41711243_DSCAM	CAGTTAATCCGCTCTGGCAT	TTATGTGCAACGTGAAGGGA	60.235	60.111	41710957	41711276	340
E070_Chr3_183887917_DVL3	CCAACCTGTCTCTCCACGAT	ACTGCTCCGACTGCCTGTAG	60.112	60.611	183887820	183888120	321
E070_Chr1_231502192_EGLN1	GGTGAAGTGGGGTATTGCTG	TGTTGAAGAAACTCAAATGGCTT	60.375	60.156	231502146	231502493	368
E070_Chr5_176314473_HK3	CTGTGGTCACACGTACCAGG	AACCATGATCAACTGGCTGC	60.064	61.078	176314287	176314575	309
E070_Chr11_40136965_LRRC4C	ACTTTGTACGCCCCATGTGT	AGTGGAGATCAACCTGGCAC	60.299	60.12	40136661	40137036	396
E070_Chr7_106526642_PIK3CG	AAGGAACAAAGTGCTGTGCC	GAGGGTAGGGGTAGAGGCTG	60.299	60.088	106526546	106526857	332
E070_Chr20_62163954_PTK6	ACTTTATTTCCTCACGTGCCC	AGGAGGTCTGTGTGTCCTGC	60.366	60.315	62163840	62164168	350
E070_Chr1_44035444_PTPRF	GAAGTCAAGGAAAGGGGAGG	GTAGGCTGTGCTGGGATCTG	60.045	60.823	44035153	44035524	392
E070_Chr1_44056939_PTPRF	CTTTCTCGGAATATGCCTTCC	CGTCTTGACCTGGATGGTG	60.048	60.096	44056856	44057214	380
E070_Chr17_33428327_RAD51D	CTGTGGGTATGGAAACCACC	GGAGGCCCAGGTTCTAGTTC	60.088	60.074	33428176	33428546	391
E070_Chr2_238785871_RAMP1	ATACCCCTAGGCCTCTGCTG	CTTCCGGGGTCTAGAAAGGA	60.61	60.56	238785830	238786116	307
E070_Chr7_17841230_SNX13	GGAACAGAGGATGAAGGGCT	TGTTGTGTTCTTTCACTGTCTGC	60.596	60.384	17841016	17841344	349
E070_Chr2_43519247_THADA	AGGTTGCACAGGAGGTTTTG	GCTCCCATCCCAAGTCACTA	60.149	60.073	43519234	43519571	358
E070_Chr1_12186098_TNFRSF8	CAGTTTGCCCTTCTCTCAGC	GCAGAGAGCAACCTGTCCTC	60.134	60.143	12185813	12186158	366
E070_Chr5_112175213_APC	CAAGAGGCAGAATCAGCTCC	TGCTGGATTTGGTTCTAGGG	60.096	60.066	112174986	112175297	332
E070_Chr11_40136965_LRRC4C	ACTTTGTACGCCCCATGTGT	AGTGGAGATCAACCTGGCAC	60.299	60.12	40136661	40137036	396
E070_chr2_43655276_THADA	AGAAGAATGGCGTGAACCTG	AGACTCTACGCTTCCCCGAT	60.255	60.233	43655021	43655312	312
E070_Chr5_112175213_APC	CAAGAGGCAGAATCAGCTCC	TGCTGGATTTGGTTCTAGGG	60.096	60.066	112174986	112175297	332
E092_Chr6_136582497_BCLAF1	GTGGGTGCAAGTTCTGCTCT	GATGGTGTGGATTATTGGGC	60.453	60.021	136582225	136582600	396
E092_Chr13_99575606_DOCK9	ACAGCAAGCAGGTATCCCAC	GTATGCCTGCTAACTCCCCA	60.142	60.096	99575556	99575874	339
E092_Chr11_46749688_F2	CTCCTAATGCTTCCTGCTGC	AGCAGAGACTGCTGGGATGT	60.118	60.017	46749537	46749849	333
E092_ChrX_70329189_IL2RG	TTGAAGTATTGCTCCCCCAG	AAGCCATTAAGGGGATCCAG	60.066	60.278	70329101	70329432	352
E092_Chr1_11227502_MTOR	CTGAAGGTCAGGGCCAATAA	AATCATGGGAGGAGAGCACA	60.066	60.622	11227446	11227778	353
E092_Chr8_17486148_PDGFRL	CCGGCCTTTCCTACTCCTAA	CCTGCAGTAAACCACACCCT	60.564	60.028	17485900	17486231	352
E092_Chr11_125299990_PKNOX2	CCCAAAGCCAAGAAGATCAA	ACCAACTCCCGCTTTTCTTT	60.184	60.11	125299943	125300258	336
E092_Chr16_81969813_PLCG2	GGGCAAGAGTCCACAGTGAT	CTGCCGTCTGGAAATTGAGT	60.12	60.255	81969619	81969983	385
E092_Chr11_64507568_RASGRP2	ATAGTCCTGAAACTGGGGGC	TACCTACAAGTGGAAGCGGC	60.328	60.27	64507290	64507632	363
E092_Chr10_114912094_TCF7L2	ATTTATCCCCTGACCTTGGC	GCAGTTTAGCGATCCAGGAA	60.152	60.352	114912019	114912360	362
E092_Chr22_29383086_ZNRF3	TTTCCACCTTGGATCACCAT	CCTGGTGCTTACCTTGCCTA	60.173	60.262	29382824	29383201	398
E092_Chr10_32197285_ARHGAP12	GAACTCTGGACCGGGAAAAT	TCCAAAGCGTTTTATGTGCC	60.306	60.999	32197249	32197609	381
E092_chr2_43655276_THADA	AGAAGAATGGCGTGAACCTG	AGACTCTACGCTTCCCCGAT	60.255	60.233	43655021	43655312	312
E092_chr3_65425560_MAGI1	CTCAGATTTCACCCCATGCT	AGCATCTCAGACCACCTGCT	60.073	60.017	65425516	65425800	305
E069_Chr5_11199574_CTNND2	AAGAGCCCTGGGTATTGTACG	GAAAAACTGTGGTGGCATCC	60.379	60.362	11199288	11199639	373
E069_Chr10_7608019_ITIH5	CAGCTTCCTACCCAGCAGTC	AAATGGCCACAAGAAACAGC	60.012	60.118	7608002	7608327	346
E069_Chr1_226822419_ITPKB	AAGCAGTGCAAACACCACCT	AAGGAACAGGCCAAAGTGTG	60.754	60.149	226822195	226822551	377
E069_Chr1_169699750_SELE	AAGCAGGTACTGGGTTGGC	TGAGCAGAACTGATTTGGGTTT	60.126	61.015	169699423	169699789	386
E069_Chr22_47116889_CERK	GTTTCCCGTGAACGTCTGTT	GAGATGGGGTCTTGTGCTGT	60.012	60.12	47116870	47117167	318
E069_chr2_43655276_THADA	AGAAGAATGGCGTGAACCTG	AGACTCTACGCTTCCCCGAT	60.255	60.233	43655021	43655312	312
E069_chr16_88800408_PIEZO1	TGATGGTGTGAGGGTCAGTG	AACCCAGTTGGGAGATGACA	60.59	60.363	88800177	88800501	345
E076_Chr2_43814142_THADA	GAAAAGTGCAGCCTTACCCA	GAGAAGCAAGGTGGAAGCAG	60.249	60.134	43813996	43814340	365
E076_Chr5_112162937_APC	TTAGGGGGACTACAGGCCAT	CCTTTGCCTTTGTTTAGGCAT	60.703	60.476	112162821	112163131	331
E076_Chr5_7804710_ADCY2	CACGGCATTACTGTGAACCA	AGGACCTTGACCCTGAGCTT	60.574	60.252	7804616	7804939	344
E076_Chr4_83970349_COPS4	CATCGCACTGGCCTATTTTT	GGCTGTGCTATCAGGCAAGT	60.096	60.428	83970104	83970407	324
E076_Chr11_640090_DRD4	TCATGCTGCTGCTCTACTGG	GTCTGCGGTGGAGTCTGG	60.31	60.415	639889	640235	367
E076_Chr5_42695074_GHR	GAATGGAAAGAATGCCCTGA	CAGCTGATCCCATCTCCTGT	60.014	60.223	42695061	42695341	301
E076_Chr19_7119568_INSR	AGGGCAATACCCTTTCAACG	TGTGTTGGCATGTGTGTTTG	61.217	60.046	7119424	7119711	308
E076_Chr10_76780405_KAT6B	TGTTTGGAATGCTGCTGCTA	ACGCTCTTCCAATATGCCAG	60.545	60.235	76780118	76780436	339
E076_Chr5_179192432_MAML1	TCAGAATGGCGATCAACAGA	ATCATGCAAGGCAGGTCTTC	60.353	60.226	179192394	179192694	321
E076_Chr4_4861774_MSX1	ACTCGGTGTCAAAGTGGAGG	TTCTGGCAGCTTGAGGAGTC	60.151	60.678	4861679	4862010	352
E076_Chr17_41352594_NBR1	GAAGCTGTCATGGAGGAGGA	GTGAGTGGTACCTGGGCAGT	60.349	60.033	41352272	41352636	385
E076_Chr8_70964415_PRDM14	GATTTTCCCACAGATGCTGC	CATCAGTGGAGTCCTTTCGG	60.613	60.646	70964386	70964718	353
E076_Chr12_48151855_RAPGEF3	GGGCAGGTGAAAGGTACTCA	GGAAGTAGTTCTGCCTGGGG	60.111	61.008	48151648	48151949	322
E076_Chr6_170871038_TBP	ACTTAGCAGCAGCCAGCCTA	TGAGTGGAAGAGCTGTGGTG	60.313	60.022	170870852	170871196	365
E076_chr17_7578442_TP53	CAAATTTCCTTCCACTCGGA	GTTTGTTTCTTTGCTGCCGT	60.044	60.292	7578266	7578641	396
E076_chr17_43364295_MAP3K14	TCCACACGTGGTTCAGACAT	AGAGCTCAAAGTCCCTGGCT	60.005	60.532	43364249	43364611	383
E076_Chr5_112162937_APC	TTAGGGGGACTACAGGCCAT	CCTTTGCCTTTGTTTAGGCAT	60.703	60.476	112162821	112163131	331
E076_chr5_112175217_APC	CAAGAGGCAGAATCAGCTCC	TGCTGGATTTGGTTCTAGGG	60.096	60.066	112174986	112175297	332
E076_chr5_133473633_TCF7	ACTGCTTGGGCAAAGTCTTG	GCTTGTACCTTGCTTCTGGC	60.431	60.022	133473576	133473863	308
E076_chr5_176517136_FGFR4	AGCTGGTGGTGAGCTCCTTA	CACTCCTTGACACCCACACA	60.012	60.627	176516954	176517268	335
E076_chr7_116364825_MET	CGAAATCAATTCGCTCAACC	GTACAGGCATAGGAAGGCCA	60.585	60.096	116364813	116365152	360
E076_chr9_90258413_DAPK1	CAATGAACACGATCTCGCAG	AAGAGGGTGCATCAATCAGC	60.413	60.226	90258179	90258549	391
E074_Chr6_16327916_ATXN1	CTGCGGAGAACTGGAAATGT	ACAGTGGAACCTATGCCAGC	60.255	60.142	16327797	16328138	362
E074_Chr2_69093453_BMP10	AAGCTATCCAGGCCCAAGTT	CGATGGAGTAGACCGGAAAA	60.096	60.066	69093189	69093564	396
E074_Chr20_58570923_CDH26	GGGTGGTCTTAGGAATCCGT	ATGGACAGTTTGCTTCTGGG	60.19	60.111	58570714	58570994	301
E074_Chr5_178419033_GRM6	CATAGTTCCATCCCAGTGCC	AAAACACCACAGCTTCCAGC	60.34	60.299	178418963	178419286	344
E074_Chr1_71418640_PTGER3	AAAGCAGCAGTCTTGGCAAT	GCACATTGTGGGCAAGTACA	60.022	60.584	71418343	71418700	378
E074_Chr17_38512455_RARA	CGCCTCTCATCCAGGAAAT	AGGCCTCTGTCCAAGGAGTC	60.165	60.791	38512328	38512651	343
E074_Chr6_170871038_TBP	ACTTAGCAGCAGCCAGCCTA	TGAGTGGAAGAGCTGTGGTG	60.313	60.022	170870852	170871196	365
E074_Chr5_112164616_APC	TGTCTTGGCGAGCAGATGTA	CACTTGAACATGGGAGACGG	60.562	61.513	112164598	112164939	362
E074_Chr5_112175174_APC	CAAGAGGCAGAATCAGCTCC	TGCTGGATTTGGTTCTAGGG	60.096	60.066	112174986	112175297	332
E074_ChrX_135438301_GPR112	TAAATCAAAGGCTTGCCACC	AATTGCCACAACAAAGCCTC	60.074	60.118	135438100	135438440	361
E074_Chr2_141115596_LRP1B	GTATCCCGGTGCTTTGCTTA	TGGCCTTGAGAGCTTCAGAT	60.096	60.096	141115531	141115822	312
E074_chr10_7797907_KIN	GAAGGATTTCCTCCAATTACATGAT	AGGACGCAGAGTTGAAGGAAT	60.735	60.261	7797745	7798094	375
E074_chr14_105931320_MTA1	GGGAGTTCTGATCTCAGGGAG	AGCTAGAGAAGGCTGGGAGC	60.201	60.255	105931309	105931614	327
E074_chr1_16528469_ARHGEF19	GGATGTAAGCAGCAGGGATG	ATTAGGCAGGATGGGGGTAG	60.624	60.166	16528268	16528606	359
E074_chr3_53882672_IL17RB	CCCACCTGTGGTCTTCAAGT	GGTCACCCTGTGTCTGGTCT	60.002	60.006	53882451	53882825	395
E074_chr5_133473633_TCF7	ACTGCTTGGGCAAAGTCTTG	GCTTGTACCTTGCTTCTGGC	60.431	60.022	133473576	133473863	308
E075_Chr5_112175952_APC	GAGCCTCGATGAGCCATTTA	TATCATCCCCCGGTGTAAAA	60.318	60.009	112175838	112176203	386
E075_Chr19_15383837_BRD4	CTGCCTCTTGGGCTTGTTAG	TTTGGGGAGAGGAGACATTG	60.008	60.042	15383754	15384125	392
E075_Chr16_28970176_NFATC2IP	CTCCCAGGACCCTAAAGCTC	GCAGTGTCTCCTGCAAGTCA	60.204	60.187	28970164	28970536	393
E075_Chr2_226447383_NYAP2	CCCAACCTGCTTTCTCACAG	TTTAGGGTAGCCATGGGGAG	60.822	61.18	226447132	226447426	315
E075_Chr19_10572345_PDE4A	CTTCCAGAACCTCAGCAAGC	GGATGCGGTCGGAGTAGTTA	60.134	60.096	10572319	10572673	375
E075_Chr22_50724430_PLXNB2	AGGTTCTTGCCCTGGAAGTT	GAACCTGCCGTGAGTGTCTT	60.11	60.307	50724262	50724610	369
E075_Chr6_170871038_TBP	ACTTAGCAGCAGCCAGCCTA	TGAGTGGAAGAGCTGTGGTG	60.313	60.022	170870852	170871196	365
E075_Chr10_121336630_TIAL1	AGAAAGAGTGGGAGACAAGGAAG	ATGCCATTGTTTCGGTGAAC	60.279	60.765	121336340	121336689	373
E075_Chr15_41865517_TYRO3	ACTTCATCCACCGAGACCTG	AGGCACAGCCTTGACGATAG	60.112	60.419	41865293	41865594	322
E075_Chr5_112174061_APC	TCAAAGCGAGGTTTGCAGAT	CTAGGTCGGCTGGGTATTGA	60.914	60.088	112173931	112174304	394
E075_chr10_7797907_KIN	GAAGGATTTCCTCCAATTACATGAT	AGGACGCAGAGTTGAAGGAAT	60.735	60.261	7797745	7798094	375
E075_chr16_50368863_BRD7	ACTCTTGAAGGCGTGTGCTT	GTAGGCATTATCATGGTTTCCAA	60.058	60.089	50368662	50368979	338
E075_chr17_43364295_MAP3K14	TCCACACGTGGTTCAGACAT	AGAGCTCAAAGTCCCTGGCT	60.005	60.532	43364249	43364611	383
E075_chr2_11597127_E2F6	TGGGACAGATGCAAGAAACA	TTAGTAACAACTCCTGAGGTTATGGG	60.24	60.934	11596789	11597165	397
E075_chr3_53882672_IL17RB	CCCACCTGTGGTCTTCAAGT	GGTCACCCTGTGTCTGGTCT	60.002	60.006	53882451	53882825	395
E075_chr4_114238987_ANK2	CCCCTGGAAGTTGTGCTGT	AATTGGGAATGATTTTGGGG	61.117	60.725	114238757	114239076	339
E075_chr5_112175956_APC	GAGCCTCGATGAGCCATTTA	TATCATCCCCCGGTGTAAAA	60.318	60.009	112175838	112176203	386
E075_chr5_133473633_TCF7	ACTGCTTGGGCAAAGTCTTG	GCTTGTACCTTGCTTCTGGC	60.431	60.022	133473576	133473863	308
E075_chr7_116364825_MET	CGAAATCAATTCGCTCAACC	GTACAGGCATAGGAAGGCCA	60.585	60.096	116364813	116365152	360
