# Supplementary material for: Colorectal Adenomas Contain Multiple Somatic Mutations That Do Not Coincide with Synchronous Adenocarcinoma Specimens
Source: PLoS One. 2015 Mar 16;10(3):e0119946. doi: 10.1371/journal.pone.0119946 (PMC4361059; doi:10.1371/journal.pone.0119946)
Supplement: S4 Table — (XLS) [file pone.0119946.s006.xls]

## Sheet: Hoja1
Supplementary table S4. Nucleotide context in validated mutations
Sample	Name	Cromosoma	Position	WtAllele	MutAllele	-5	-4	-3	-2	-1	0	1	2	3	4	5
N2E072	Adenocarcinoma-2	Chr19	40762843	G	C	A	C	G	G	A	G	A	A	G	T	T
N2E072	Adenocarcinoma-2	Chr7	45744165	G	A	C	C	A	T	C	G	G	G	A	G	C
N2E072	Adenocarcinoma-2	Chr8	68208781	A	G	T	T	C	T	C	A	C	A	G	C	T
N2E072	Adenocarcinoma-2	Chr1	32201250	C	G	T	G	A	T	T	C	C	G	A	T	G
N2E072	Adenocarcinoma-2	Chr20	30450487	C	T	T	A	G	C	C	C	C	G	T	C	A
N2E072	Adenocarcinoma-2	Chr2	212530168	T	A	C	A	T	C	T	T	T	A	A	A	A
N2E072	Adenocarcinoma-2	Chr14	54878241	T	C	T	G	T	T	T	T	C	T	G	C	A
N2E072	Adenocarcinoma-2	Chr4	126412567	A	T	T	A	T	A	T	A	C	T	T	C	C
N2E072	Adenocarcinoma-2	Chr12	122657162	G	C	G	T	C	T	A	G	C	T	G	T	C
N2E072	Adenocarcinoma-2	Chr12	25398285	C	T	G	C	C	A	C	C	A	G	C	T	C
N2E072	Adenocarcinoma-2	Chr11	68157518	G	A	A	G	A	T	C	G	A	G	G	T	G
N2E072	Adenocarcinoma-2	Chr12	18837081	A	C	A	T	A	G	A	A	G	T	G	G	C
N2E072	Adenocarcinoma-2	Chr18	45368209	T	C	C	A	T	G	C	T	T	G	A	G	C
N2E072	Adenocarcinoma-2	Chr6	168949856	C	T	A	A	A	G	T	C	G	G	C	A	G
N2E072	Adenocarcinoma-2	Chr7	17885311	T	C	A	G	T	A	T	T	T	A	T	T	T
N2E072	Adenocarcinoma-2	Chr5	112174793	G	T	A	T	A	A	T	G	A	A	G	A	G
N2E072	Adenocarcinoma-2	Chr5	112175507	C	T	C	C	G	T	T	C	A	G	A	G	T
N2E072	Adenocarcinoma-2	Chr10	99003739	G	A	A	A	G	T	T	G	T	T	T	C	T
N2E072	Adenocarcinoma-2	Chr15	67479795	C	T	T	G	A	C	C	C	G	A	A	T	G
N2E070	Adenoma-2	Chr11	67413212	G	A	A	C	T	T	C	G	C	G	A	T	T
N2E070	Adenoma-2	ChrX	55032975	C	T	C	A	G	G	G	C	G	C	A	A	G
N2E070	Adenoma-2	Chr17	42827993	G	A	G	C	A	G	C	G	A	T	G	G	A
N2E070	Adenoma-2	Chr21	41711243	G	A	T	G	A	T	C	G	T	G	G	G	C
N2E070	Adenoma-2	Chr1	231502192	T	C	A	G	G	T	T	T	A	T	T	G	A
N2E070	Adenoma-2	Chr5	176314473	G	A	G	G	C	C	C	G	G	A	C	G	A
N2E070	Adenoma-2	Chr5	112175213	A	T	A	A	A	T	A	A	A	A	G	A	A
N2E070	Adenoma-2	Chr11	40136965	A	G	G	C	T	C	T	A	G	A	T	G	A
N2E070	Adenoma-2	Chr7	106526642	A	T	G	C	A	T	T	A	A	T	A	A	A
N2E070	Adenoma-2	Chr20	62163954	C	T	C	A	C	C	A	C	G	G	C	G	T
N2E070	Adenoma-2	Chr1	44035444	G	A	G	C	T	G	C	G	T	T	C	A	G
N2E070	Adenoma-2	Chr2	238785871	C	A	C	C	C	A	T	C	A	C	C	T	C
N2E070	Adenoma-2	Chr7	17841230	G	C	G	A	G	C	C	G	A	A	A	C	T
N2E070	Adenoma-2	Chr1	12186098	G	A	G	A	A	G	C	G	A	A	T	T	C
N2E092	Adenoma/Hyper-2	Chr11	46749688	C	A	T	G	G	T	G	C	G	C	A	T	T
N2E092	Adenoma/Hyper-2	Chr11	64507568	A	G	C	A	G	G	G	A	C	A	T	C	T
N2E092	Adenoma/Hyper-2	Chr22	29383086	A	G	A	T	G	T	A	A	T	A	A	C	A
N2E092	Adenoma/Hyper-2	Chr10	32197285	T	A	A	A	C	T	T	T	A	G	G	A	G
N1E076	Adenocarcinoma-1	Chr5	7804710	C	T	C	C	A	A	G	C	C	A	A	A	A
N1E076	Adenocarcinoma-1	Chr5	42695074	G	T	C	T	G	C	T	G	G	G	G	A	A
N1E076	Adenocarcinoma-1	Chr19	7119568	A	G	T	G	G	T	G	A	T	T	T	C	C
N1E076	Adenocarcinoma-1	Chr10	76780405	C	T	T	G	G	G	C	C	G	T	C	T	C
N1E076	Adenocarcinoma-1	Chr5	179192432	C	T	A	G	A	C	T	C	G	C	C	G	G
N1E076	Adenocarcinoma-1	Chr17	41352594	G	A	T	C	C	C	A	G	A	G	G	T	A
N1E076	Adenocarcinoma-1	Chr8	70964415	C	T	G	T	G	A	A	C	G	C	C	G	G
N1E076	Adenocarcinoma-1	Chr12	48151855	A	G	T	G	G	C	C	A	G	C	C	C	A
N1E074	Adenoma-30	Chr5	112175174	G	T	C	A	C	A	G	G	A	A	G	C	A
N1E074	Adenoma-30	Chr2	69093453	G	T	T	C	A	C	T	G	T	T	G	G	T
N1E074	Adenoma-30	Chr5	178419033	G	A	A	T	A	G	C	G	T	G	T	G	G
N1E074	Adenoma-30	Chr1	71418640	C	T	G	C	T	C	A	C	G	A	G	T	A
N1E074	Adenoma-30	Chr17	38512455	A	G	G	A	A	G	C	A	G	C	C	C	G
N1E074	Adenoma-30	ChrX	135438301	G	T	A	G	G	A	A	G	A	G	A	T	G
N1E074	Adenoma-30	Chr2	141115596	G	A	A	A	G	T	C	G	A	T	C	A	C
N1E074	Adenoma-30	Chr5	112164616	C	T	C	G	T	T	G	C	G	A	G	A	A
N1E075	Adenoma-90	Chr19	15383837	T	C	A	C	A	T	T	T	G	G	G	A	A
N1E075	Adenoma-90	Chr16	28970176	A	G	C	T	G	A	C	A	T	C	A	T	T
N1E075	Adenoma-90	Chr2	226447383	C	T	A	C	C	C	C	C	G	T	C	T	A
N1E075	Adenoma-90	Chr22	50724430	G	A	G	G	C	A	C	G	G	A	C	G	A
N1E075	Adenoma-90	Chr10	121336630	C	A	T	T	T	A	C	C	C	C	A	A	T
N1E075	Adenoma-90	Chr15	41865517	A	G	A	G	A	G	G	A	C	A	T	G	A
		Numbers -5, -4, -3, -2, -1, 0, 1, 2, 3, 4 and 5 show nt distance from validated mutation
